# Supplementary material
Source: Springer Nature journal article supplement (https://www.springermedizin.de/resource/supplementary/12936_2011_1782_MOESM1_ESM.pdf/9541752)

 Study Site (Sub-district)

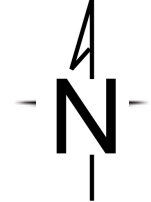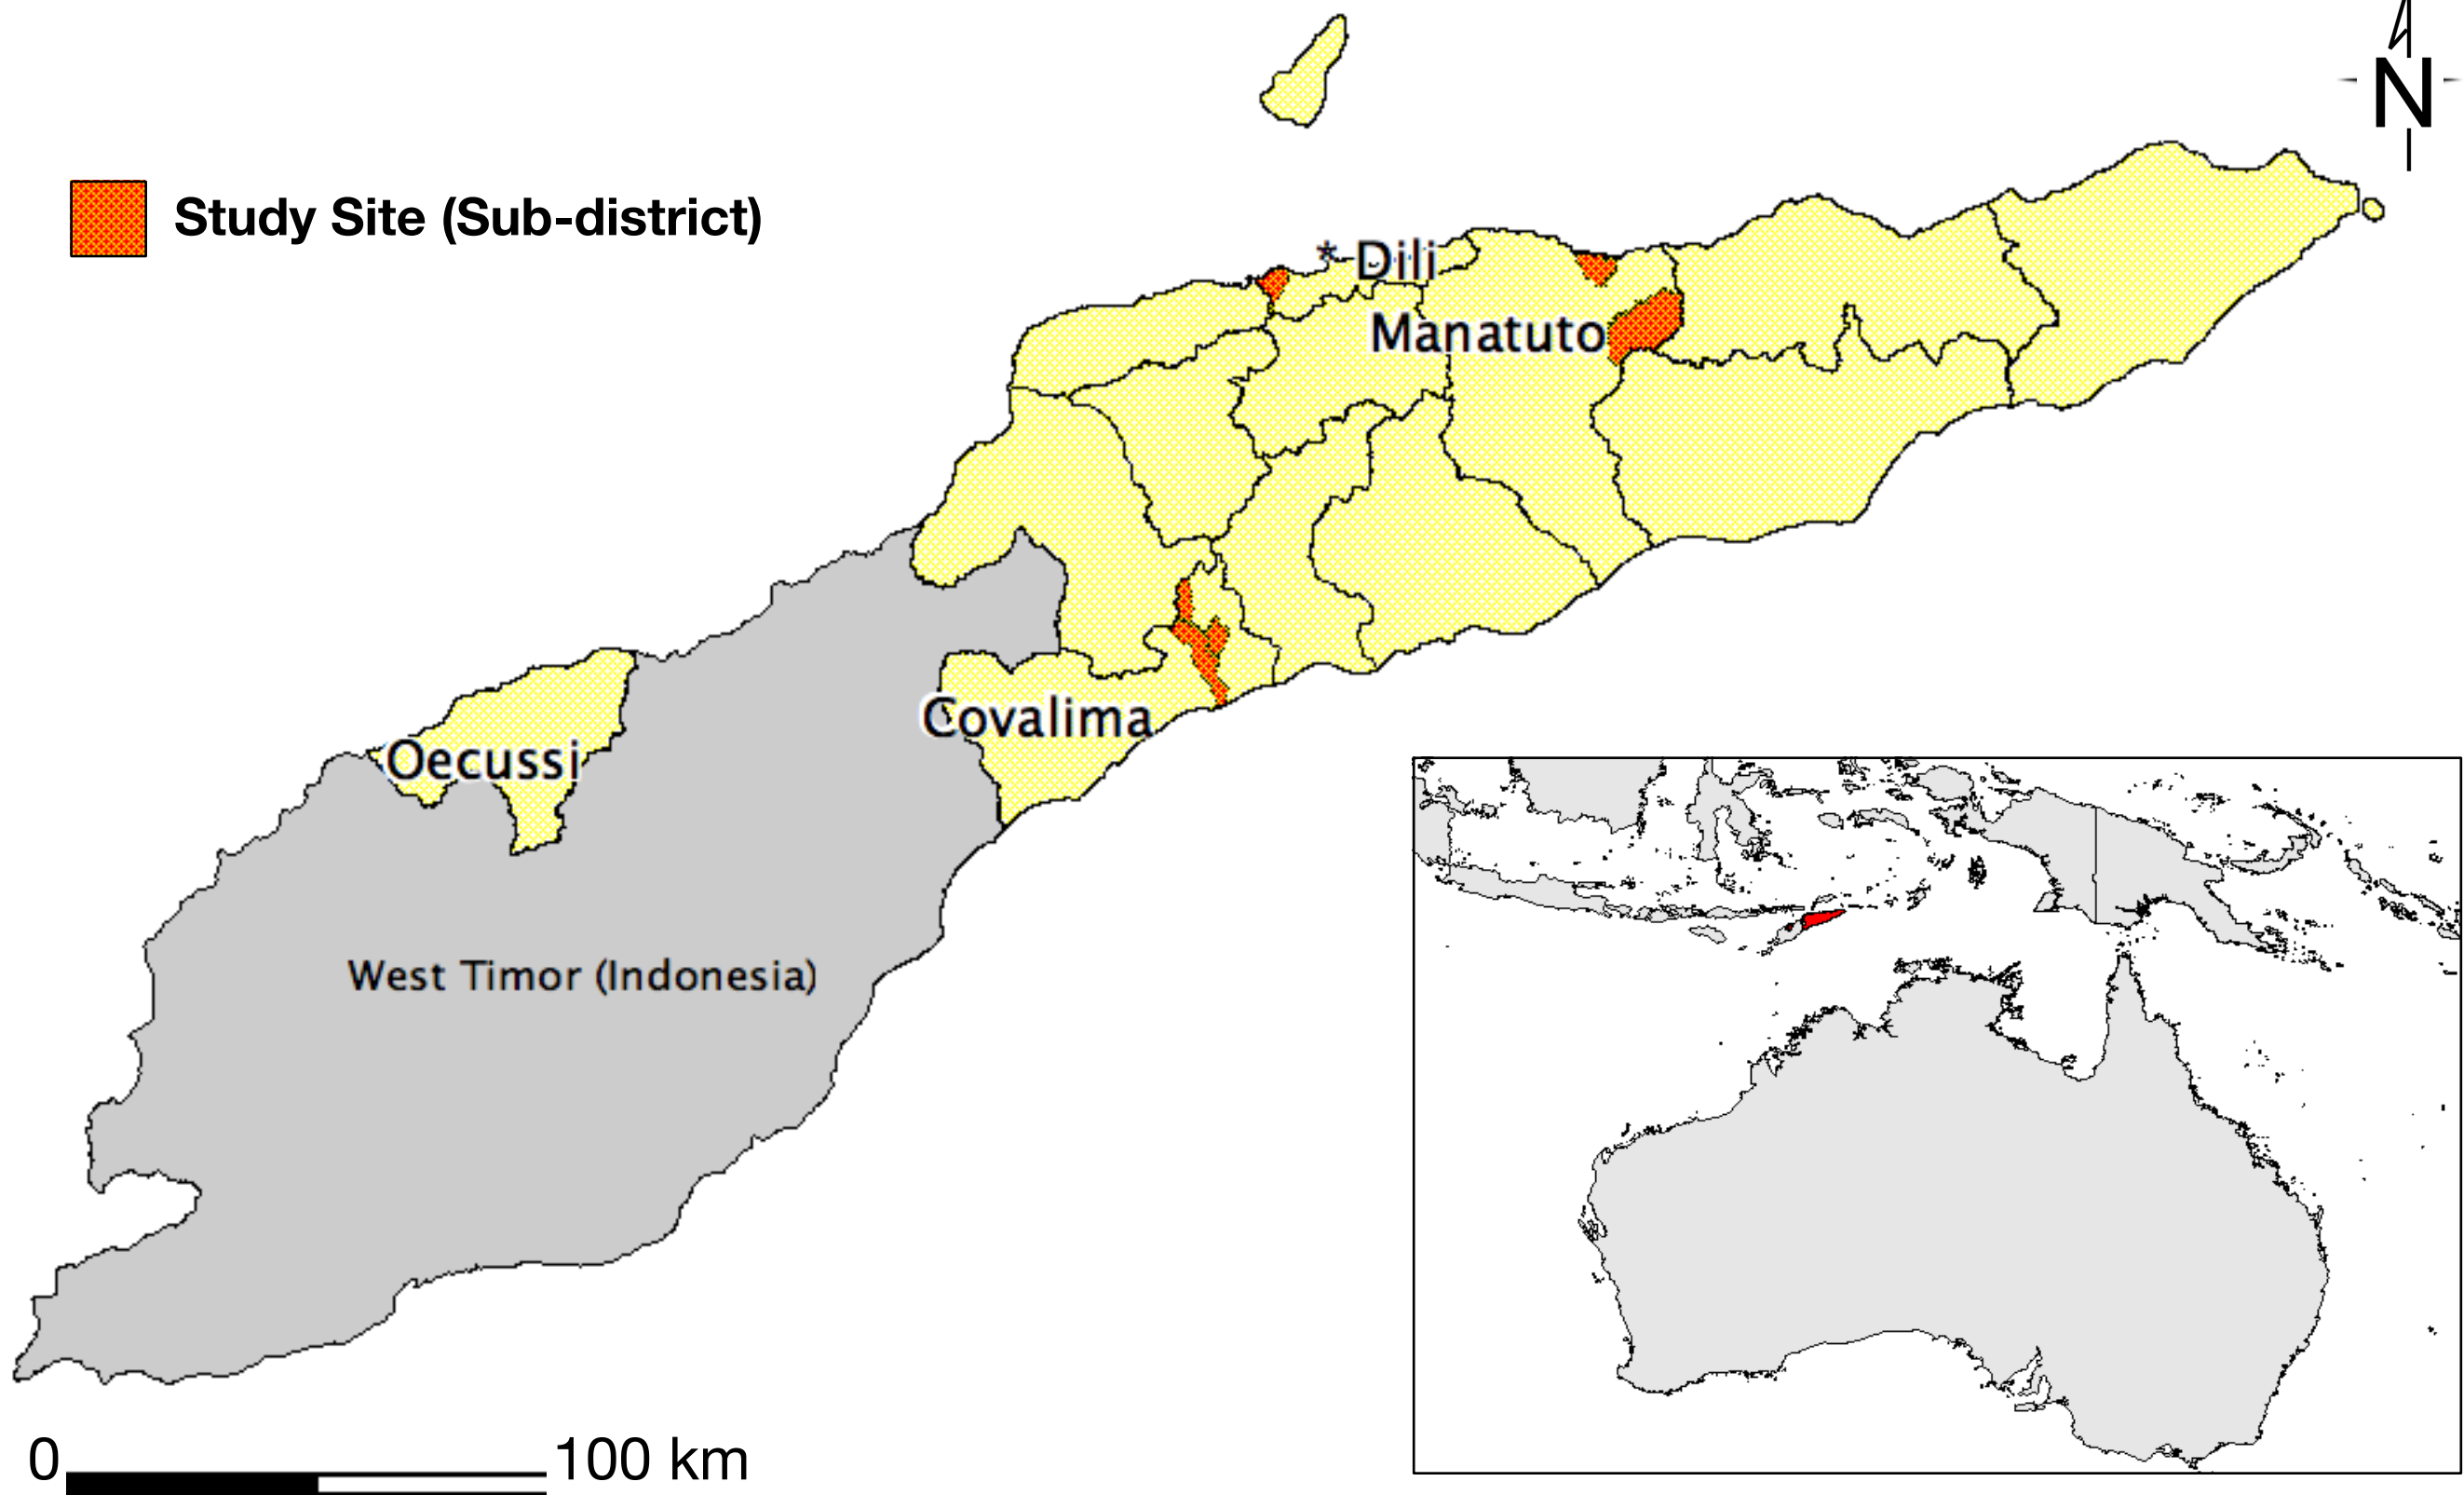

0 100 km

Supplement: MOESM1 [file 9541752]
